# Supplementary material
Source: PubMed Central journal article supplement (PMC6309267)
Supplement: NIHMS1505577-supplement-3.pdf [file NIHMS1505577-supplement-3.pdf]

**LICENSE TO PUBLISH – OPEN ACCESS**  
US Government Employees and Contractors

**SPRINGER NATURE**

Manuscript Number:

18-0236-TR 18

Journal Name:

Laboratory Investigation

(the "Journal")

Proposed Title of the Article:

**Multiplexed, high-throughput measurements of cell contraction and endothelial barrier function**

(the "Article")

Author(s) [Please list all named authors, continuing on a separate sheet if necessary]:

Ramin Rokhzan, Chandra Ghosh, Nicole Schaible, Jacob Notbohm, Haruka Yoshie, Allen J. Ehrlicher, Sarah J. Higgins, Ruyuan Zhang, Hermann Haller, Corey C. Hardin, Sascha David, Samir M. Parikh, Ramaswamy Krishnan.

(the "Author(s)")

Miscellaneous [for office use only]:

**License applicable to the Article:**

**Creative Commons license CC BY:** This license allows readers to copy, distribute and transmit the Article as long as it is attributed back to the author. Readers are permitted to alter, transform or build upon the Article, and to use the Article for commercial purposes. Please read the full license for further details at - <http://creativecommons.org/licenses/by/4.0/>

will consider publishing this article, including any supplementary information and graphic elements therein (e.g. illustrations, charts, moving images) (the "Article"), including granting readers rights to use the Article on an open access basis under the terms of the stated Creative Commons license. Headings are for convenience only.

**2. Grant of Rights**

Subject to editorial acceptance of the Article, it will be published under the Creative Commons license shown above. The grant of rights set forth below applies only if, and to the extent that, all or any part of the Article is not in the public domain by virtue of having been written by a US Government employee in the course of his/her official duties or by a US Government contractor under a contract which transfers rights in the Article to the US Government. In consideration of the Licensee evaluating the Article for publication, the Author(s) grant the Licensee a non-exclusive, irrevocable and sub-licensable right, unlimited in time and territory, to copy-edit, reproduce, publish, distribute, transmit, make available and store the Article, including abstracts thereof, in all forms of media of expression now known or developed in the future, including pre- and reprints, translations, photographic reproductions and extensions. Furthermore, to enable additional publishing services, such as promotion of the Article, the Author(s) grant the Licensee the right to use the Article (including any graphic elements on a stand-alone basis) in whole or in part in electronic form, such as for display in databases or data networks (e.g. the Internet), or for print or download to stationary or portable devices. This includes interactive and multimedia use as well as posting the Article in full or in part on social media, and the right to alter the Article to the extent necessary for such use. Author(s) grant to Licensee the right to re-license Article metadata without restriction, including but not limited to author name, title, abstract, citation, references, keywords and any additional information as determined by Licensee.

**3. Warranties**

The Author(s) warrant and represent that:

- a) (i) they are US Government employees or US Government contractors and have prepared the Article in the course of their official duties,
- (ii) only if, and to the extent that, any part of the Article is not in the public domain by virtue of subclause (i) above, the Author(s) are the sole owners or have been authorized by any additional copyright owner to grant the rights defined in clause 2,
- (iii) the Article does not infringe any intellectual property rights (including without limitation copyright, database rights or trade mark rights) or other third party rights and no license from or payments to a third party are required to publish the Article,
- (iv) the Article has not been previously published or licensed,
- (v) if the Article contains materials from other sources (e.g. illustrations, tables, text quotations), Author(s) have obtained written permissions to the extent

necessary from the copyright holder(s), to license to the Licensee the same rights as set out in clause 2 and have cited any such materials correctly;

- b) all of the facts contained in the Article are according to the current body of science true and accurate;
- c) nothing in the Article is obscene, defamatory, violates any right of privacy or publicity, infringes any other human, personal or other rights of any person or entity or is otherwise unlawful and that informed consent to publish has been obtained for all research participants;
- d) nothing in the Article infringes any duty of confidentiality which any of the Author(s) might owe to anyone else or violates any contract, express or implied, of any of the Author(s). All of the institutions in which work recorded in the Article was created or carried out, have authorized and approved such research and publication; and
- e) the signatory (the Author or the employer) who has signed this agreement has full right, power and authority to enter into this agreement on behalf of all of the Author(s).

**4. Cooperation**

- a) The Author(s) shall cooperate fully with the Licensee in relation to any legal action that might arise from the publication of the Article, and the Author(s) shall give the Licensee access at reasonable times to any relevant accounts, documents and records within the power or control of the Author(s). The Author(s) agree that the distributing entity is intended to have the benefit of and shall have the right to enforce the terms of this agreement.
- b) The Author(s) authorize the Licensee to take such steps as it considers necessary at its own expense in the Author(s)' name and on their behalf if the Licensee believes that a third party is infringing or is likely to infringe copyright in the Article including but not limited to initiating legal proceedings.

**5. Author List**

After signing, changes of authorship or the order of the authors listed will not be accepted unless formally approved in writing by the Licensee.

**6. Edits & Corrections**

The Author(s) agree(s) that the Licensee may retract the Article or publish a correction or other notice in relation to the Article if the Licensee considers in its reasonable opinion that such actions are appropriate from a legal, editorial or research integrity perspective.

**7. Governing Law**

This agreement shall be governed by, and shall be construed in accordance with, the laws of the State of New York. The courts of New York, New York shall have the exclusive jurisdiction.

Signed for and on behalf of the Author(s):

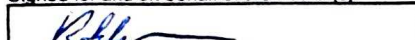

(PLEASE NOTE, ONLY HANDWRITTEN SIGNATURES ARE ACCEPTED)

Print Name:

Ramin Rokhzan

Date:

08/19/2018

Address:

Gerberstr. 6, 30169 Hannover, Germany



# LICENCE TO PUBLISH

Crown Government Employees

# SPRINGER NATURE

Manuscript Number:

18-0236-TR 18

Journal Name:

Laboratory Investigation

(the "Journal")

Proposed Title of the Article:

**Multiplexed, high-throughput measurements of cell contraction and endothelial barrier function**

(the "Article")

Author(s) [Please list all named authors, continuing on a separate sheet if necessary]:

**Ramin Rokhzan, Chandra Ghosh, Niccole Schaible, Jacob Notbohm, Haruka Yoshie, Allen J. Ehrlicher, Sarah J. Higgins, Ruyuan Zhang, Hermann Haller, Corey C. Hardin, Sascha David, Samir M. Parikh, Ramaswamy Krishnan.**

(the "Author(s)")

Miscellaneous (for office use only):

will consider publishing this article, including any supplementary information and graphic elements therein (e.g. illustrations, charts, moving images) (the 'Article'). Headings are for convenience only.

## 2. Grant of Rights

In consideration of the Licensee evaluating the Article for publication, the Author(s) grant the Licensee the non-exclusive and sub-licensable right, unlimited in time and territory, to copy-edit, reproduce, publish, distribute, transmit, make available and store the Article, including abstracts thereof, in all forms of media of expression now known or developed in the future, including pre- and reprints, translations, photographic reproductions and extensions. Furthermore, to enable additional publishing services, such as promotion of the Article, the Author(s) grant the Licensee the right to use the Article (including the use of any graphic elements on a stand-alone basis) in whole or in part in electronic form, such as for display in databases or data networks (e.g. the Internet), or for print or download to stationary or portable devices. This includes interactive and multimedia use as well as posting the Article in full or in part or its abstract on social media, and the right to alter the Article to the extent necessary for such use. The Licensee may also let third parties share the Article in full or in part or its abstract on social media and may in this context sub-license the Article and its abstract to social media users. Author(s) grant to Licensee the right to re-license Article metadata without restriction (including but not limited to author name, title, abstract, citation, references, keywords and any additional information as determined by Licensee).

## 3. Warranties

The Author(s) warrant and represent that:

a) (i) they are an employee of a Crown Body ("Crown") located in United Kingdom of Great Britain and Northern Ireland, Canada or Australia and therefore publishing under Crown Right (e.g. for Canada: pursuant to Section 12 of the Copyright Act of Canada) and that, (ii) the Author(s) are the sole owners or have been authorised by any additional copyright owner to grant the rights defined in clause 2, (iii) the Article does not infringe any intellectual property rights (including without limitation copyright, database rights or trade mark rights) or other third party rights and no licence from or payments to a third party are required to publish the Article (iv) the Article has not been previously published or licensed, (v) if the Article contains materials from other sources (e.g. illustrations, tables, text quotations), Author(s) have obtained written permissions to the extent necessary from the copyright holder(s), to license to the Licensee the same rights as set out in clause 2 and have cited any such materials correctly;

b) all of the facts contained in the Article are according to the current body of science true and accurate;

c) nothing in the Article is obscene, defamatory, violates any right of privacy or publicity, infringes any other human, personal or other rights of any person or entity or is otherwise unlawful and that informed consent to publish has been obtained for all research participants;

d) nothing in the Article infringes any duty of confidentiality which any of the Author(s) might owe to anyone else or violates any contract, express or implied, of any of the Author(s). All of the institutions in which work recorded in the Article was created or carried out have authorised and approved such research and publication; and

e) the signatory (the Author or the employer) who has signed this agreement has full right, power and authority to enter into this agreement on behalf of all of the Author(s).

## 4. Cooperation

a) The Author(s) shall cooperate fully with the Licensee in relation to any legal action that might arise from the publication of the Article and the Author(s) shall give the Licensee access at reasonable times to any relevant accounts, documents and records within the power or control of the Author(s). The Author(s) agree that the distributing entity is intended to have the benefit of and shall have the right to enforce the terms of this agreement.

b) The Author(s) authorise the Licensee to take such steps as it considers necessary at its own expense in the Author(s)' name and on their behalf if the Licensee believes that a third party is infringing or is likely to infringe copyright in the Article including but not limited to initiating legal proceedings.

## 5. Author List

After signing, changes of authorship or the order of the authors listed will not be accepted unless formally approved in writing by the Licensee.

## 6. Edits & Corrections

The Author(s) agree(s) that the Licensee may retract the Article or publish a correction or other notice in relation to the Article if the Licensee considers in its reasonable opinion that such actions are appropriate from a legal, editorial or research integrity perspective.

## 7. Governing Law

This agreement shall be governed by, and shall be construed in accordance with, the laws of England and Wales. The courts of London, UK shall have the exclusive jurisdiction.

Signed for and on behalf of the Author(s):



(PLEASE NOTE, ONLY HANDWRITTEN SIGNATURES ARE ACCEPTED)

Print Name:

Ramin Rokhzan

Date:

08/19/2018

Address:

Gerberstr. 6, 30169 Hannover, Germany



**LICENSE TO PUBLISH**  
US Government Employees and Contractors

Manuscript Number:

18-0236-TR 18

Journal Name:

Laboratory Investigation

(the "Journal")

Proposed Title of the Article:

**Multiplexed, high-throughput measurements of cell contraction and endothelial barrier function**

(the "Article")

Author(s) [Please list all named authors, continuing on a separate sheet if necessary]:

Ramin Rokhzan, Chandra Ghosh, Nicole Schaible, Jacob Notbohm, Haruka Yoshie, Allen J. Ehrlicher, Sarah J. Higgins, Ruyuan Zhang, Hermann Haller, Corey C. Hardin, Sascha David, Samir M. Parikh, Ramaswamy Krishnan.

(the "Author(s)")

Miscellaneous [for office use only]:

will consider publishing this article, including any supplementary information and graphic elements therein (e.g. illustrations, charts, moving images) (the 'Article'). Headings are for convenience only.

**2. Grant of Rights**

The grant of rights set forth below applies only if, and to the extent that, all or any part of the Article is not in the public domain by virtue of having been written by a US Government employee in the course of his/her official duties or by a US Government contractor under a contract which transfers rights in the Article to the US Government. In consideration of the Licensee evaluating the Article for publication, the Author(s) grant the Licensee the non-exclusive and sub-licensable right, unlimited in time and territory, to copy-edit, reproduce, publish, distribute, transmit, make available and store the Article, including abstracts thereof, in all forms of media of expression now known or developed in the future, including pre- and reprints, translations, photographic reproductions and extensions. Furthermore, to enable additional publishing services, such as promotion of the Article, the Author(s) grant the Licensee the right to use the Article (including the use of any graphic elements on a stand-alone basis) in whole or in part in electronic form, such as for display in databases or data networks (e.g. the Internet), or for print or download to stationary or portable devices. This includes interactive and multimedia use as well as posting the Article in full or in part or its abstract on social media, and the right to alter the Article to the extent necessary for such use. The Licensee may also let third parties share the Article in full or in part or its abstract on social media and may in this context sub-license the Article and its abstract to social media users. Author(s) grant to Licensee the right to re-license Article metadata without restriction (including but not limited to author name, title, abstract, citation, references, keywords and any additional information as determined by Licensee).

**3. Warranties**

The Author(s) warrant and represent that:

- a) (i) they are US Government employees or US Government contractors and have prepared the Article in the course of their official duties,
- (ii) only if, and to the extent that, any part of the Article is not in the public domain by virtue of subclause (i) above, the Author(s) are the sole owners or have been authorized by any additional copyright owner to grant the rights defined in clause 2,
- (iii) the Article does not infringe any intellectual property rights (including without limitation copyright, database rights or trade mark rights) or other third party rights and no license from or payments to a third party are required to publish the Article,
- (iv) the Article has not been previously published or licensed,
- (v) if the Article contains materials from other sources (e.g. illustrations, tables,

text quotations), Author(s) have obtained written permissions to the extent necessary from the copyright holder(s), to license to the Licensee the same rights as set out in clause 2 and have cited any such materials correctly;

b) all of the facts contained in the Article are according to the current body of science true and accurate;

- c) nothing in the Article is obscene, defamatory, violates any right of privacy or publicity, infringes any other human, personal or other rights of any person or entity or is otherwise unlawful and that informed consent to publish has been obtained for all research participants;
- d) nothing in the Article infringes any duty of confidentiality which any of the Author(s) might owe to anyone else or violates any contract, express or implied, of any of the Author(s). All of the institutions in which work recorded in the Article was created or carried out have authorized and approved such research and publication; and
- e) the signatory (the Author or the employer) who has signed this agreement has full right, power and authority to enter into this agreement on behalf of all of the Author(s).

**4. Cooperation**

- a) The Author(s) shall cooperate fully with the Licensee in relation to any legal action that might arise from the publication of the Article and the Author(s) shall give the Licensee access at reasonable times to any relevant accounts, documents and records within the power or control of the Author(s). The Author (s) agree that the distributing entity is intended to have the benefit of and shall have the right to enforce the terms of this agreement.
- b) The Author(s) authorize the Licensee to take such steps as it considers necessary at its own expense in the Author(s)' name and on their behalf if the Licensee believes that a third party is infringing or is likely to infringe copyright in the Article including but not limited to initiating legal proceedings.

**5. Author List**

After signing, changes of authorship or the order of the authors listed will not be accepted unless formally approved in writing by the Licensee.

**6. Edits & Corrections**

The Author(s) agree(s) that the Licensee may retract the Article or publish a correction or other notice in relation to the Article if the Licensee considers in its reasonable opinion that such actions are appropriate from a legal, editorial or research integrity perspective.

**7. Governing Law**

This agreement shall be governed by, and shall be construed in accordance with, the laws of the State of New York. The courts of New York, New York shall have the exclusive jurisdiction.

Signed for and on behalf of the Author(s):

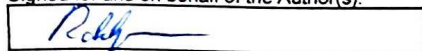

(PLEASE NOTE, ONLY HANDWRITTEN SIGNATURES ARE ACCEPTED)

Print Name:

Ramin Rokhzan

Date:

08/19/2018

Address:

Gerberstr. 6, 30169 Hannover, Germany



# LICENCE TO PUBLISH

# SPRINGER NATURE

Manuscript Number:

18-0236-TR 18

Journal Name:

Laboratory Investigation

(the "Journal")

Proposed Title of the Article:

**Multiplexed, high-throughput measurements of cell contraction and endothelial barrier function**

(the "Article")

Author(s) [Please list all authors, continuing on a separate sheet if necessary]:

**Ramin Rokhzan, Chandra Ghosh, Nicole Schaible, Jacob Notbohm, Haruka Yoshie, Allen J. Ehrlicher, Sarah J. Higgins, Ruyuan Zhang, Hermann Haller, Corey C. Hardin, Sascha David, Samir M. Parikh, Ramaswamy Krishnan.**

(the "Author(s)")

Miscellaneous [for office use only]:

will consider publishing this article, including any supplementary information and graphic elements therein (e.g. illustrations, charts, moving images) (the "Article"). Headings are for convenience only.

## 2. Grant of Rights

In consideration of the Licensee evaluating the Article for publication, the Author(s) grant the Licensee the exclusive (except as set out in clauses 3, 4 and 5a) iv) and sub-licensable right, unlimited in time and territory, to copy-edit, reproduce, publish, distribute, transmit, make available and store the Article, including abstracts thereof, in all forms of media of expression now known or developed in the future, including pre- and reprints, translations, photographic reproductions and extensions. Furthermore, to enable additional publishing services, such as promotion of the Article, the Author(s) grant the Licensee the right to use the Article (including the use of any graphic elements on a stand-alone basis) in whole or in part in electronic form, such as for display in databases or data networks (e.g. the Internet), or for print or download to stationary or portable devices. This includes interactive and multimedia use as well as posting the Article in full or in part or its abstract on social media, and the right to alter the Article to the extent necessary for such use. The Licensee may also let third parties share the Article in full or in part or its abstract on social media and may in this context sub-license the Article and its abstract to social media users. Author(s) grant to Licensee the right to re-license Article metadata without restriction (including but not limited to author name, title, abstract, citation, references, keywords and any additional information as determined by Licensee).

## 3. Self-Archiving

Author(s) are permitted to self-archive a pre-print and an author's accepted manuscript version of their Article.

a) A pre-print is the author's version of the Article before peer-review has taken place ("Pre-Print"). Prior to acceptance for publication, Author(s) retain the right to make a Pre-Print of their Article available on any of the following: their own personal, self-maintained website; a legally compliant, non-commercial pre-print server such as but not limited to arXiv and bioRxiv. Once the Article has been published, the Author (s) should update the acknowledgement and provide a link to the definitive version on the publisher's website: "This is a pre-print of an article published in [insert journal title]. The final authenticated version is available online at: [https://doi.org/\[insert DOI\]](https://doi.org/[insert DOI])"

b) An Author's Accepted Manuscript ("AAM") is the version accepted for publication in a journal following peer review but prior to copyediting and typesetting that can be made available under the following conditions:

i) Author(s) retain the right to make an AAM of their Article available on their own personal, self-maintained website immediately on acceptance,

ii) Author(s) retain the right to make an AAM of their Article available for public release on any of the following 6 months after first publication ("Embargo Period"): their employer's internal website, their institutional and/or funder repositories. AAMs may also be deposited in such repositories immediately on acceptance, provided that they are not made publicly available until after the Embargo Period.

An acknowledgement in the following form should be included, together with a link to the published version on the publisher's website: "This is a post-peer-review, pre-copyedit version of an article published in [insert journal title]. The final authenticated version is available online at: [http://dx.doi.org/\[insert DOI\]](http://dx.doi.org/[insert DOI])"

## 4. Author's Retained Rights

Author(s) retain the following non-exclusive rights for the published version provided that, when reproducing the Article or extracts from it, the Author(s) acknowledge and reference first publication in the Journal:

a) to reuse graphic elements created by the Author(s) and contained in the Article, in presentations and other works created by them;

b) they and any academic institution where they work at the time may reproduce the

Article for the purpose of course teaching (but not for inclusion in course pack material for onward sale by libraries and institutions); and

c) to reproduce, or to allow a third party Licensee to reproduce the Article in whole or in part in any printed volume (book or thesis) written by the Author(s).

## 5. Warranties

The Author(s) warrant and represent that:

a) (i) the Author(s) are the sole copyright owners or have been authorised by any additional copyright owner to assign the rights defined in clause 2, (ii) the Article does not infringe any intellectual property rights (including without limitation copyright, database rights or trade mark rights) or other third party rights and no licence from or payments to a third party are required to publish the Article, (iii) the Article has not been previously published or licensed, (iv) if the Article contains materials from other sources (e.g. illustrations, tables, text quotations), Author(s) have obtained written permissions to the extent necessary from the copyright holder(s), to license to the Licensee the same rights as set out in clause 2 but on a non-exclusive basis and without the right to use any graphic elements on a stand-alone basis and have cited any such materials correctly;

b) all of the facts contained in the Article are according to the current body of science true and accurate;

c) nothing in the Article is obscene, defamatory, violates any right of privacy or publicity, infringes any other human, personal or other rights of any person or entity or is otherwise unlawful and that informed consent to publish has been obtained for all research participants;

d) nothing in the Article infringes any duty of confidentiality which any of the Author(s) might owe to anyone else or violates any contract, express or implied, of any of the Author(s). All of the institutions in which work recorded in the Article was created or carried out have authorised and approved such research and publication; and

e) the signatory (the Author or the employer) who has signed this agreement has full right, power and authority to enter into this agreement on behalf of all of the Author(s).

## 6. Cooperation

a) The Author(s) shall cooperate fully with the Licensee in relation to any legal action that might arise from the publication of the Article and the Author(s) shall give the Licensee access at reasonable times to any relevant accounts, documents and records within the power or control of the Author(s). The Author(s) agree that the distributing entity is intended to have the benefit of and shall have the right to enforce the terms of this agreement.

b) The Author(s) authorise the Licensee to take such steps as it considers necessary at its own expense in the Author(s)' name and on their behalf if the Licensee believes that a third party is infringing or is likely to infringe copyright in the Article including but not limited to initiating legal proceedings.

## 7. Author List

After signing, changes of authorship or the order of the authors listed will not be accepted unless formally approved in writing by the Licensee.

## 8. Edits & Corrections

The Author(s) agree(s) that the Licensee may retract the Article or publish a correction or other notice in relation to the Article if the Licensee considers in its reasonable opinion that such actions are appropriate from a legal, editorial or research integrity perspective.

## 9. Governing Law

Signed for and on behalf of the Author(s):



(PLEASE NOTE, ONLY HANDWRITTEN SIGNATURES ARE ACCEPTED)

Print Name:

Ramin Rokhzan

Date:

08/19/2018

Address:

Gerberstr. 6, 30169 Hannover, Germany



Crown Government Employees

Manuscript Number:

18-0236-TR 18

Journal Name:

Laboratory Investigation

(the "Journal")

Proposed Title of the Article:

Multiplexed, high-throughput measurements of cell contraction and endothelial barrier function

(the "Article")

Author(s) [Please list all named authors, continuing on a separate sheet if necessary]:

Ramin Rokhzan, Chandra Ghosh, Nicole Schaible, Jacob Notbohm, Haruka Yoshie, Allen J. Ehrlicher, Sarah J. Higgins, Ruyuan Zhang, Hermann Haller, Corey C. Hardin, Sascha David, Samir M. Parikh, Ramaswamy Krishnan.

(the "Author(s)")

Miscellaneous [for office use only]:

Licence applicable to the Article:

**Creative Commons licence CC BY:** This licence allows readers to copy, distribute and transmit the Article as long as it is attributed back to the author. Readers are permitted to alter, transform or build upon the Article, and to use the Article for commercial purposes. Please read the full licence for further details at - <http://creativecommons.org/licenses/by/4.0/>

will consider publishing this article, including any supplementary information and graphic elements therein (e.g. illustrations, charts, moving images) (the 'Article'), including granting readers rights to use the Article on an open access basis under the terms of the stated Creative Commons licence. Headings are for convenience only.

2. Grant of Rights

Subject to editorial acceptance of the Article, it will be published under the Creative Commons licence shown above. In consideration of the Licensee evaluating the Article for publication, the Author(s) grant the Licensee a non-exclusive, irrevocable and sub-licensable right, unlimited in time and territory, to copy-edit, reproduce, publish, distribute, transmit, make available and store the Article, including abstracts thereof, in all forms of media of expression now known or developed in the future, including pre- and reprints, translations, photographic reproductions and extensions. Furthermore, to enable additional publishing services, such as promotion of the Article, the Author(s) grant the Licensee the right to use the Article (including any graphic elements on a stand-alone basis) in whole or in part in electronic form, such as for display in databases or data networks (e.g. the Internet), or for print or download to stationary or portable devices. This includes interactive and multimedia use as well as posting the Article in full or in part on social media, and the right to alter the Article to the extent necessary for such use. Author(s) grant to Licensee the right to re-license Article metadata without restriction, including but not limited to author name, title, abstract, citation, references, keywords and any additional information as determined by Licensee.

3. Warranties

The Author(s) warrant and represent that:

a) (i) they are employees of a Crown Body ("Crown") located in United Kingdom of Great Britain and Northern Ireland, Canada or Australia and therefore publishing under Crown Right (e.g. for Canada: pursuant to Section 12 of the Copyright Act of Canada) and that, (ii) the Author(s) are the sole owners or have been authorised by any additional copyright owner to grant the rights defined in clause 2, (iii) the Article does not infringe any intellectual property rights (including without limitation copyright, database rights or trade mark rights) or other third party rights and no licence from or payments to a third party are required to publish the Article, (iv) the Article has not been previously published or licensed, (v) if the Article contains materials from other sources (e.g. illustrations, tables, text quotations), Author(s) have obtained written permissions to the extent necessary from the copyright holder(s), to license to the Licensee the same rights as set out in clause 2 and have cited any such materials correctly;

b) all of the facts contained in the Article are according to the current body of science true and accurate;

c) nothing in the Article is obscene, defamatory, violates any right of privacy or publicity, infringes any other human, personal or other rights of any person or entity or is otherwise unlawful and that informed consent to publish has been obtained for all research participants;

d) nothing in the Article infringes any duty of confidentiality which any of the Author(s) might owe to anyone else or violates any contract, express or implied, of any of the Author(s). All of the institutions in which work recorded in the Article was created or carried out have authorised and approved such research and publication; and

e) the signatory (the Author or the employer) who has signed this agreement has full right, power and authority to enter into this agreement on behalf of all of the Author(s).

4. Cooperation

a) The Author(s) shall cooperate fully with the Licensee in relation to any legal action that might arise from the publication of the Article and the Author(s) shall give the Licensee access at reasonable times to any relevant accounts, documents and records within the power or control of the Author(s). The Author(s) agree that the distributing entity is intended to have the benefit of and shall have the right to enforce the terms of this agreement.

b) The Author(s) authorise the Licensee to take such steps as it considers necessary at its own expense in the Author(s) name and on their behalf if the Licensee believes that a third party is infringing or is likely to infringe copyright in the Article including but not limited to initiating legal proceedings.

5. Author List

After signing, changes of authorship or the order of the authors listed will not be accepted unless formally approved in writing by the Licensee.

6. Edits & Corrections

The Author(s) agree(s) that the Licensee may retract the Article or publish a correction or other notice in relation to the Article if the Licensee considers in its reasonable opinion that such actions are appropriate from a legal, editorial or research integrity perspective.

7. Governing Law

This agreement shall be governed by, and shall be construed in accordance with, the laws of England and Wales. The courts of London, UK shall have the exclusive jurisdiction.

Signed for and on behalf of the Author(s):



Print Name:

Ramin Rokhzan

Date:

08/19/2018

(PLEASE NOTE, ONLY HANDWRITTEN SIGNATURES ARE ACCEPTED)

Address:

Gerberstr. 6, 30169 Hannover, Germany



Manuscript Number:

18-0236-TR 18

Journal Name:

Select a Journal

(the "Journal")

Proposed Title of the Article:

Multiplexed, high-throughput measurements of cell contraction and endothelial barrier function

(the "Article")

Author(s) [Please list all named authors, continuing on a separate sheet if necessary]:

Ramin Rokhzan, Chandra Ghosh, Niccole Schaible, Jacob Notbohm, Haruka Yoshie, Allen J. Ehrlicher, Sarah J. Higgins, Ruyuan Zhang, Hermann Haller, Corey C. Hardin, Sascha David, Samir M. Parikh, Ramaswamy Krishnan.

(the "Author(s)")

Miscellaneous [for office use only]:

**Licence applicable to the Article:**

**Creative Commons licence CC BY:** This licence allows readers to copy, distribute and transmit the Article as long as it is attributed back to the author. Readers are permitted to alter, transform or build upon the Article, and to use the Article for commercial purposes. Please read the full licence for further details at - <http://creativecommons.org/licenses/by/4.0/>

will consider publishing this article, including any supplementary information and graphic elements therein (e.g. illustrations, charts, moving images) (the 'Article'), including granting readers rights to use the Article on an open access basis under the terms of the stated Creative Commons licence. Headings are for convenience only.

**2 Grant of Rights**

Subject to editorial acceptance of the Article, it will be published under the Creative Commons licence shown above. In consideration of the Licensee evaluating the Article for publication, the Author(s) grant the Licensee a non-exclusive, irrevocable and sub-licensable right, unlimited in time and territory, to copy, edit, reproduce, publish, distribute, transmit, make available and store the Article, including abstracts thereof, in all forms of media of expression now known or developed in the future, including pre- and reprints, translations, photographic reproductions and extensions. Furthermore, to enable additional publishing services, such as promotion of the Article, the Author(s) grant the Licensee the right to use the Article (including any graphic elements on a stand-alone basis) in whole or in part in electronic form, such as for display in databases or data networks (e.g. the Internet), or for print or download to stationary or portable devices. This includes interactive and multimedia use as well as posting the Article in full or in part on social media, and the right to alter the Article to the extent necessary for such use. Author(s) grant to Licensee the right to re-license Article metadata without restriction, including but not limited to author name, title, abstract, citation, references, keywords and any additional information as determined by Licensee.

**3 Copyright**

Ownership of copyright in the Article shall vest in the Author(s). When reproducing the Article or extracts from it, the Author(s) acknowledge and reference first publication in the Journal.

**4 Self-Archiving**

The rights and licensing terms applicable to the version of the Article as published by the Licensee are set out in sections 2 and 3 above. The following applies to versions of the Article preceding publication by the Licensee and/or copyediting and typesetting by the Licensee. Author(s) are permitted to self-archive a pre-print and an author's accepted manuscript version of their Article.

a) A pre-print is the author's version of the Article before peer-review has taken place ("Pre-Print"). Prior to acceptance for publication, Author(s) retain the right to make a Pre-Print of their Article available on any of the following: their own personal, self-maintained website; a legally compliant, non-commercial pre-print server such as but not limited to arXiv and bioRxiv. Once the Article has been published, the Author(s) should update the acknowledgement and provide a link to the definitive version on the publisher's website: "This is a pre-print of an article published in [insert journal title]. The final authenticated version is available online at: [https://doi.org/\[insert DOI\]](https://doi.org/[insert DOI])".

b) An Author's Accepted Manuscript (AAM) is the version accepted for publication in a journal following peer review but prior to copyediting and typesetting. Author(s) retain the right to make an AAM of their Article available on any of the following, provided that they are not made publicly available until after first publication: their own personal, self-maintained website; their employer's internal website; their institutional and/or funder repositories. AAMs may be deposited in such repositories on acceptance, provided that they are not made publicly available until after first publication. An acknowledgement in the following form should be included, together with a link to the published version on the publisher's website: "This is a post-peer-review, pre-copyedited version of an article published in [insert journal title]. The final authenticated version is available online at: [http://dx.doi.org/\[insert DOI\]](http://dx.doi.org/[insert DOI])".

**5 Warranties**

The Author(s) warrant and represent that:

- (i) the Author(s) are the sole copyright owners or have been authorised by any additional copyright owner to assign the rights defined in clause 2, (ii) the Article does not infringe any intellectual property rights (including without limitation copyright, database rights or trade mark rights) or other third party rights and no licence from or payments to a third party are required to publish the Article, (iii) the Article has not been previously published or licensed, (iv) if the Article contains materials from other sources (e.g. illustrations, tables, text quotations), Author(s) have obtained written permissions to the extent necessary from the copyright holder(s), to license to the Licensee the same rights as set out in clause 2 and have cited any such materials correctly;
- all of the facts contained in the Article are according to the current body of science true and accurate;
- nothing in the Article is obscene, defamatory, violates any right of privacy or publicity, infringes any other human, personal or other rights of any person or entity or is otherwise unlawful and that informed consent to publish has been obtained for all research participants;
- nothing in the Article infringes any duty of confidentiality which any of the Author(s) might owe to anyone else or violates any contract, express or implied, of any of the Author(s). All of the institutions in which work recorded in the Article was created or carried out have authorised and approved such research and publication; and
- the signatory (the Author or the employer) who has signed this agreement has full right, power and authority to enter into this Agreement on behalf of all of the Author(s).

**6 Cooperation**

- The Author(s) shall cooperate fully with the Licensee in relation to any legal action that might arise from the publication of the Article, and the Author(s) shall give the Licensee access at reasonable times to any relevant accounts, documents and records within the power or control of the Author(s). The Author(s) agree that the distributing entity is intended to have the benefit of and shall have the right to enforce the terms of this agreement.
- The Author(s) authorise the Licensee to take such steps as it considers necessary at its own expense in the Author(s)' name and on their behalf if the Licensee believes that a third party is infringing or is likely to infringe copyright in the Article including but not limited to initiating legal proceedings.

**7 Author List**

After signing, changes of authorship or the order of the authors listed will not be accepted unless formally approved in writing by the Licensee.

**8 Edits & Corrections**

The Author(s) agree(s) that the Licensee may retract the Article or publish a correction or other notice in relation to the Article if the Licensee considers in its reasonable opinion that such actions are appropriate from a legal, editorial or research integrity perspective.

**9. Governing Law**

Signed for and on behalf of the Author(s):



(PLEASE NOTE, ONLY HANDWRITTEN SIGNATURES ARE ACCEPTED)

Address:

Print Name:

Ramin Rokhzan

Date:

08/19/2018

Gerberstr. 6, 30169 Hannover, Germany

## OPEN ACCESS Article Processing Charge (APC) Payment Form

If you wish to take the open access option for your article, you must complete this payment form in addition to the Open Access Licence to Publish form. This will allow your manuscript (as both full-text HTML and PDF) to be made open access immediately upon publication, permanently available free of charge to all readers.

Completion of this form constitutes consent for the indicated article to be published on an open access basis in accordance with the Open Access Licence to Publish form and confirms you agree to the charges detailed below. Credit terms are 30 days from date of invoice. Failure to pay your invoice within the stated credit term will result in the open access status of the article being rescinded, with the article being published and placed behind the paywall. You may also be subject to restrictions on your ability to publish with Springer Nature or this title in the future, involvement of a third party debt collection agency and legal proceedings.

**It is mandatory to send this completed form and the Open Access Licence to Publish form to the return address (details below) to ensure your paper is published open access. If you do not wish your article to be made open access it is not necessary to complete this form.**

### The APC will be charged at the following rate:

| Licence Type                        | APC                       |
|-------------------------------------|---------------------------|
| CC BY*: CreativeCommons-Attribution | £2,500 / \$3,200 / €2,900 |

VAT or local taxes will be added where applicable: for details please see [www.nature.com/TaxInformation](http://www.nature.com/TaxInformation)

Where authors publish open access in this journal through payment of an APC, any additional publication fees such as page or colour charges are waived.

\* The Creative Commons Attribution (CC BY) Licence is preferred by many research funding bodies. We support use of this licence as it is recommended for maximum dissemination and use of open access materials.

Other Creative Commons licences are available - Please contact the editorial office if you would like to discuss an alternative Creative Commons licence, quoting your manuscript number.

### Manuscript Details (COMPLETE IN BLOCK CAPITALS)

Title of article:

**MULTIPLEXED, HIGH-THROUGHPUT MEASUREMENTS OF CELL CONTRACTION AND ENDOTHELIAL BARRIER FUNCTION**

Manuscript number:

**18-0236-TR 18**

Corresponding author name:

**RAMASWAMY KRISHNAN**

Corresponding author email address:

**rkrishn2@bidmc.harvard.edu**

### Billing Details (COMPLETE IN BLOCK CAPITALS)

Contact name:

**Marti Cross**

Billing address:

**BIDMC  
330 Brookline Avenue, RN 214  
Boston, MA**

Postcode/ZIP:

**02215-5491**

VAT / GST/Tax Number:

**1042103881A1**

Organisation name:

**Beth Israel Deaconess Medical Center, Inc.**

Email Address:

**mcross@bidmc.harvard.edu**

Tel Number:

**617-975-8547**

**Payment Method:**

**Credit Card** We will contact you via telephone to obtain your credit card details.

Tel No: (if different from above)

**Invoice** An invoice will be sent by post and email.

Payment is required within 30 days.

PO Number (if required)

**PLEASE RETURN YOUR COMPLETED PAYMENT FORM AND OPEN ACCESS LICENCE TO PUBLISH TO:**

Dr Catherine Ketcham, Managing Editor **Email:** [labinvest@comcast.net](mailto:labinvest@comcast.net)
